# Supplementary material
Source: PubMed Central journal article supplement (PMC5831367)
Supplement: NIHMS934719-supplement-7.pdf [file NIHMS934719-supplement-7.pdf]

### A NPC monolayer culture protocol

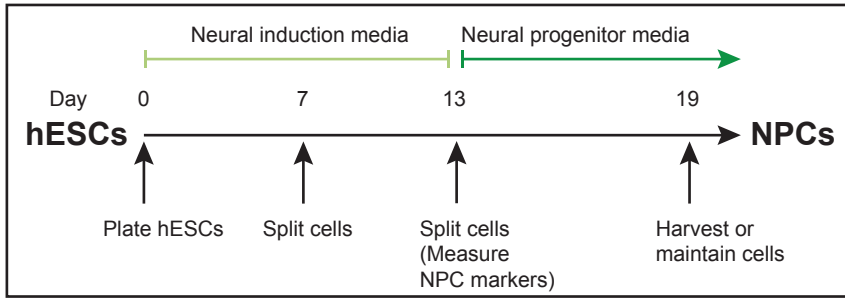

### B (NPCs)

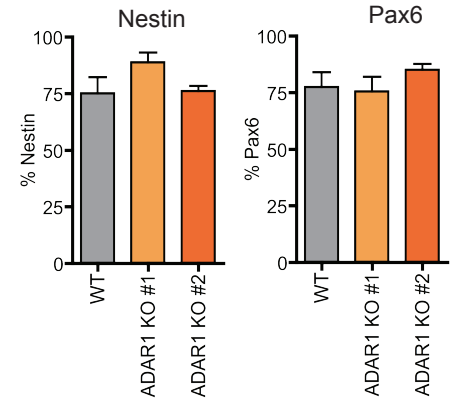

### C Albumin

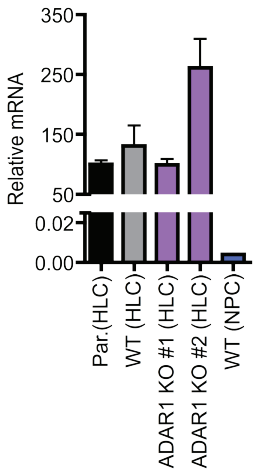

### AFP

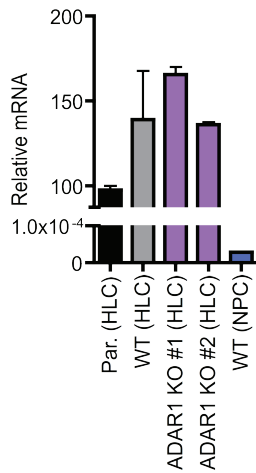

### D (HLCs)

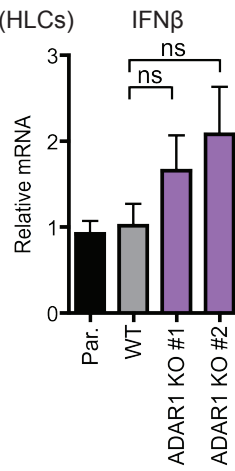

### E (HLCs)

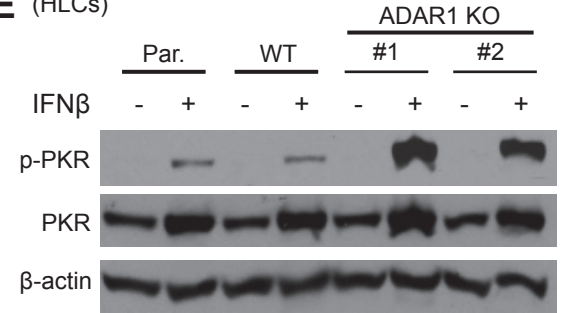

### F Gene knock-down (KD) protocol in NPCs

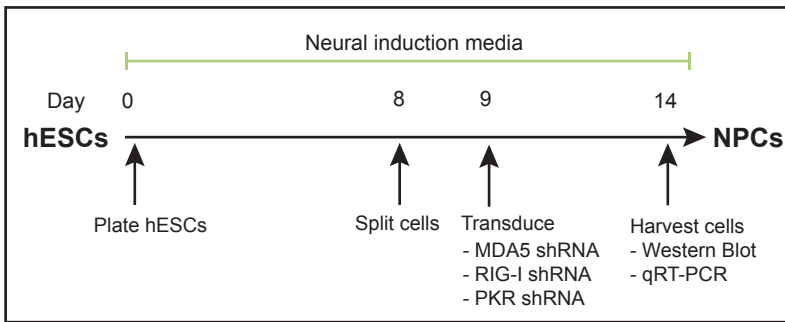

### G

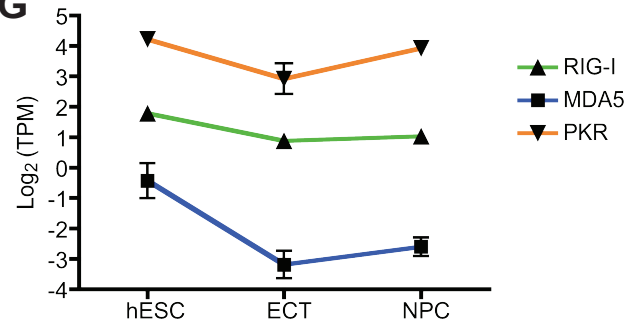

Figure S7
