# Supplementary material
Source: PubMed Central journal article supplement (PMC5831367)
Supplement: NIHMS934719-supplement-8.pdf [file NIHMS934719-supplement-8.pdf]

| <b>gRNA</b>  | <b>Targeting gene</b> | <b>gRNA sequence</b>                                              | <b>Targeting region of ADAR1 or ADAR2</b> |
|--------------|-----------------------|-------------------------------------------------------------------|-------------------------------------------|
| ADAR1 g1     | ADAR1                 | Fwd: CACCGTTATATCTCGGGCCTTGGTA<br>Rev:AAACTACCAAGGCCCGAGATATAAC   | Exon 2                                    |
| ADAR1 g2     | ADAR1                 | Fwd: CACCGTGA CTCTCTGCCCTGAATT<br>Rev: AAACAATTCAGGGCAGAGGAGTCAC  | Exon 2                                    |
| ADAR1p150 g1 | ADAR1p150             | Fwd: CACCGCGTAGTTCTCATGCAGCGGA<br>Rev: AAACTCCGCTGCATGAGAACTACGC  | Upstream of exon 1A                       |
| ADAR1p150 g2 | ADAR1p150             | Fwd: CACCGCTTGGACCTTCGCCGCCGTC<br>Rev: AAACGACGGCGGCGAAGGTCCAAGC  | Downstream of exon 1A                     |
| ADAR1p110 g1 | ADAR1p110             | Fwd: CACCGCAA ACTCTCATCTAGAGGCC<br>Rev: AAACGGCCTCTAGATGAGAGTTTGC | Upstream of exon 1B                       |
| ADAR1p110 g2 | ADAR1p110             | Fwd: CACCGTCCCGAGGAAGTGCAAGACC<br>Rev: AAACGGTCTTGCACTTCCTCGGGAC  | Downstream of exon 1B                     |
| ADAR1p110 g3 | ADAR1p110             | Fwd: CACCGAGAAGGACAGAGGCTCTTAC<br>Rev: AAACGTAAGAGCCTCTGTCCTTCTC  | Downstream of exon 1B                     |
| ADAR2 g1     | ADAR2                 | Fwd: CACCGTGTGAAGGAAAACCGCAATC<br>Rev: AAACGATTGCGGTTTTCTTCACAC   | Exon 4                                    |
| ADAR2 g2     | ADAR2                 | Fwd: CACCGTCTGGACAACGTGTCCCCCA<br>Rev :AAACTGGGGGACACGTTGTCCAGAC  | Exon 4                                    |

**Table S1: Guide RNA (gRNA) sequences and targeting location, Related to Figure 1, 6, and S1**
