# Supplementary material
Source: PubMed Central journal article supplement (PMC5831367)
Supplement: NIHMS934719-supplement-9.pdf [file NIHMS934719-supplement-9.pdf]

| Parental cell line | gRNA             | Cell line label | ADAR1 western blot results                    | DNA sequencing results                   |
|--------------------|------------------|-----------------|-----------------------------------------------|------------------------------------------|
| HEK 293T           | ADAR1 g1         | ADAR1 KO        | ADAR1p110 <sup>-</sup> ADAR1p150 <sup>-</sup> | Exon 2: 370 bp deletion                  |
| HEK 293T           | ADAR1 g2         | ADAR1 KO        | ADAR1p110 <sup>-</sup> ADAR1p150 <sup>-</sup> | Exon 2: 1 bp deletion or 172 bp deletion |
| HEK 293T           | ADAR1 g2         | ADAR1 KO        | ADAR1p110 <sup>-</sup> ADAR1p150 <sup>-</sup> | Exon 2: 320 bp deletion                  |
| HEK 293T           | ADAR1p150 g1, g2 | ADAR1p150 KO    | ADAR1p110 <sup>+</sup> ADAR1p150 <sup>-</sup> | Pi and exon 1A deleted                   |
| HEK 293T           | ADAR1p150 g1, g2 | ADAR1p150 KO    | ADAR1p110 <sup>+</sup> ADAR1p150 <sup>-</sup> | Pi and exon 1A deleted                   |
| HEK 293T           | ADAR1p150 g1, g2 | ADAR1p150 KO    | ADAR1p110 <sup>+</sup> ADAR1p150 <sup>-</sup> | Not available                            |
| HEK 293T           | ADAR1p110 g1, g2 | ADAR1p110_Δ     | ADAR1p110 <sup>+</sup> ADAR1p150 <sup>+</sup> | Pc and exon 1B deleted                   |
| HEK 293T           | ADAR1p110 g1, g3 | ADAR1p110_Δ     | ADAR1p110 <sup>+</sup> ADAR1p150 <sup>+</sup> | Pc and exon 1B deleted                   |
| HEK 293T           | ADAR2 g1         | ADAR2 KO        | ADAR2 <sup>-</sup>                            | Exon 4: 10 bp deletion or 14 bp deletion |
| HEK 293T           | ADAR2 g2         | ADAR2 KO        | ADAR2 <sup>-</sup>                            | Exon 4: 212 bp deletion or 2 bp deletion |
| HUES8-iCas9        | ADAR1 g2         | ADAR1 KO        | ADAR1p110 <sup>-</sup> ADAR1p150 <sup>-</sup> | Exon 2: 1 bp insertion                   |
| HUES8-iCas9        | ADAR1 g2         | ADAR1 KO        | ADAR1p110 <sup>-</sup> ADAR1p150 <sup>-</sup> | Exon 2: 1 bp insertion or 23 bp deletion |

**Table S2: Summary of ADAR1-deficient cell lines generated in this study, Related to Figure 1, 6, and S1**

For guide RNA (gRNA) sequence refer to Table S1. ADAR1p110\_Δ indicates cell clones that maintain ADAR1p110 expression at a reduced level. '+' indicates a positive band and '-' indicates a negative band by western blot. Pc , constitutively active promoter; Pi, interferon inducible promoter (See Figure 1A).
