# Supplementary material
Source: PubMed Central journal article supplement (PMC5831367)
Supplement: NIHMS934719-supplement-14.pdf [file NIHMS934719-supplement-14.pdf]

| Gene name       | Forward                 | Reverse                 |
|-----------------|-------------------------|-------------------------|
| STAT1           | AGGAAAAGCAAGCGTAATCTTCA | TATTCCCCGACTGAGCCTGAT   |
| IFITM3          | CTGGGCTTCATAGCATTGCGCT  | AGATGTTTCAGGCACTTGGCGGT |
| $\beta$ 2M      | GAGGCTATCCAGCGTACTCCA   | CGGCAGGCATACTCATCTTTT   |
| IFN $\gamma$ R1 | TCTTTGGGTCAGAGTTAAAGCCA | TTCCATCTCGGCATACAGCAA   |
| IFN $\beta$     | GTCAGAGTGGAAATCCTAG     | ACAGCATCTGCTGGTTGAAG    |
| ISG15           | GGCTGGGAGCTGACGGTGAAG   | GCTCCGCCCGCCAGGCTCTGT   |
| PKR             | TGGAAAGCGAACAAGGAGTAAG  | CCATCCCGTAGGTCTGTGAA    |
| IFIT1           | ACACCTGAAAGGCCAGAATG    | GGTTTTTCAGGGTCCACTTCA   |
| CD9             | CCTGCTGTTTCGGATTAACTTCA | TGGTCTGAGAGTCGAATCGGA   |
| 18S rRNA        | GTAACCCGTTGAACCCATT     | CCATCCAATCGGTAGTAGCG    |

**Table S7: Oligos used for qRT-PCR, related to Figure 3, 6, 7, S3, S6, and S7**
