# Supplementary material
Source: PubMed Central journal article supplement (PMC5831367)

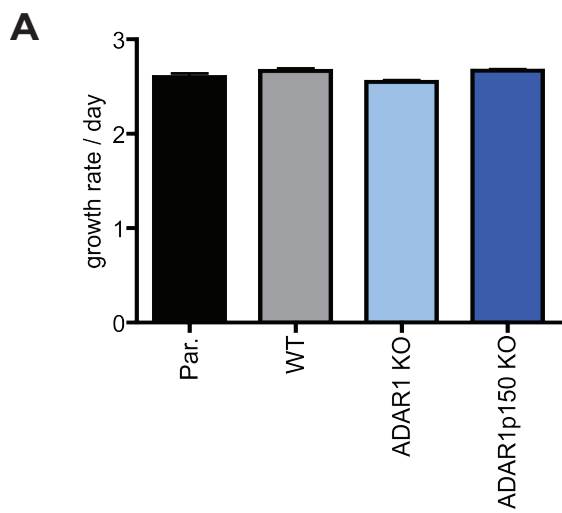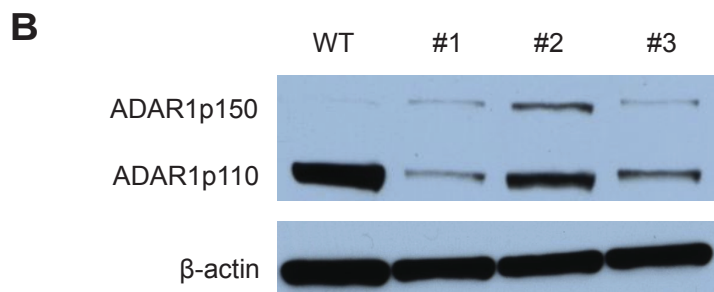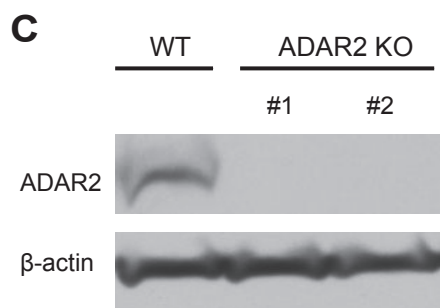

**Figure S1**

Supplement: NIHMS934719-supplement-1.pdf [file NIHMS934719-supplement-1.pdf]

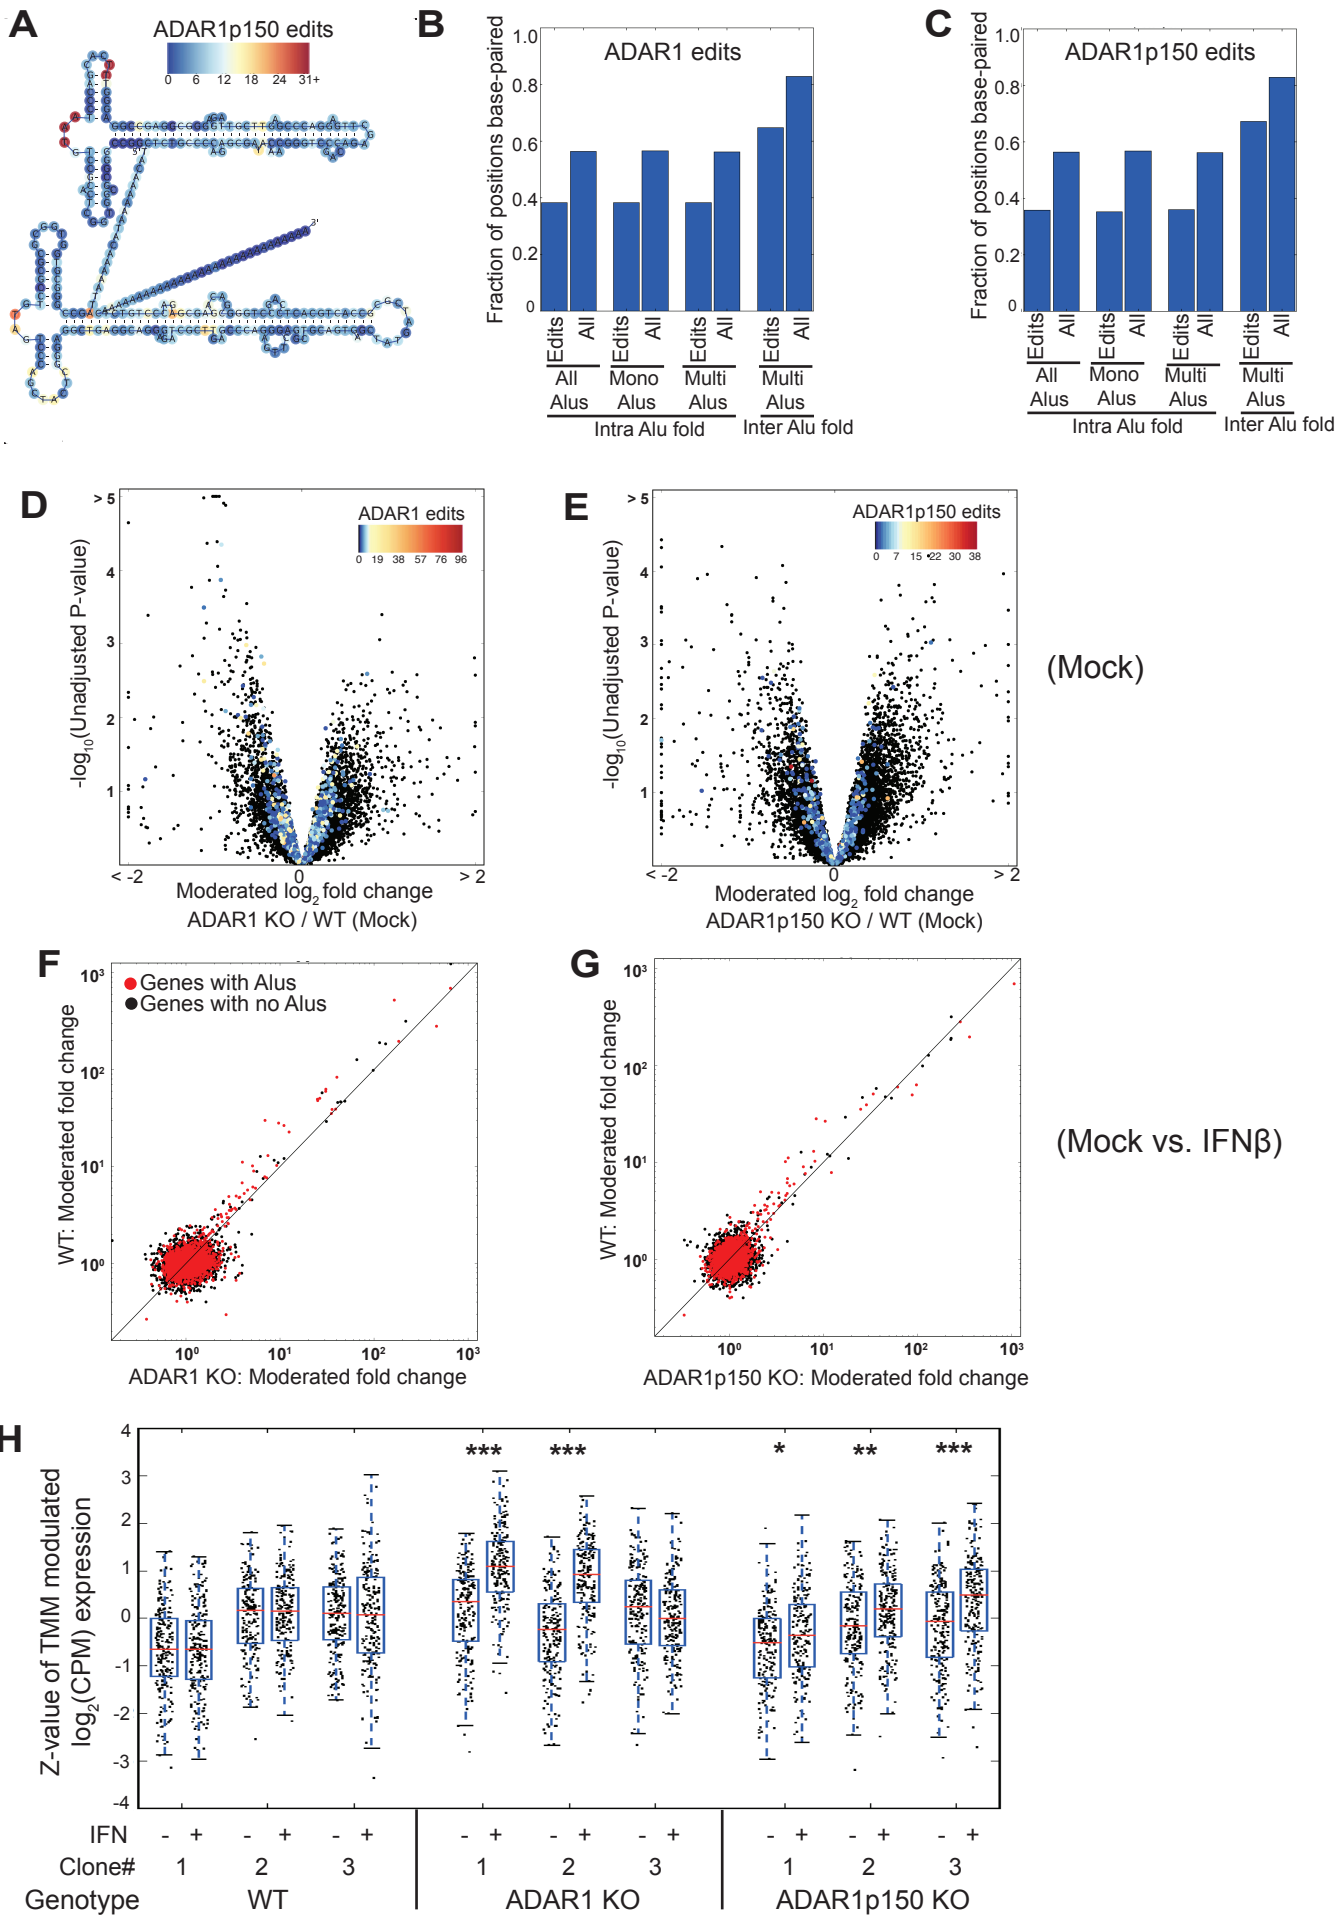

Figure S2

Supplement: NIHMS934719-supplement-2.pdf [file NIHMS934719-supplement-2.pdf]

**A**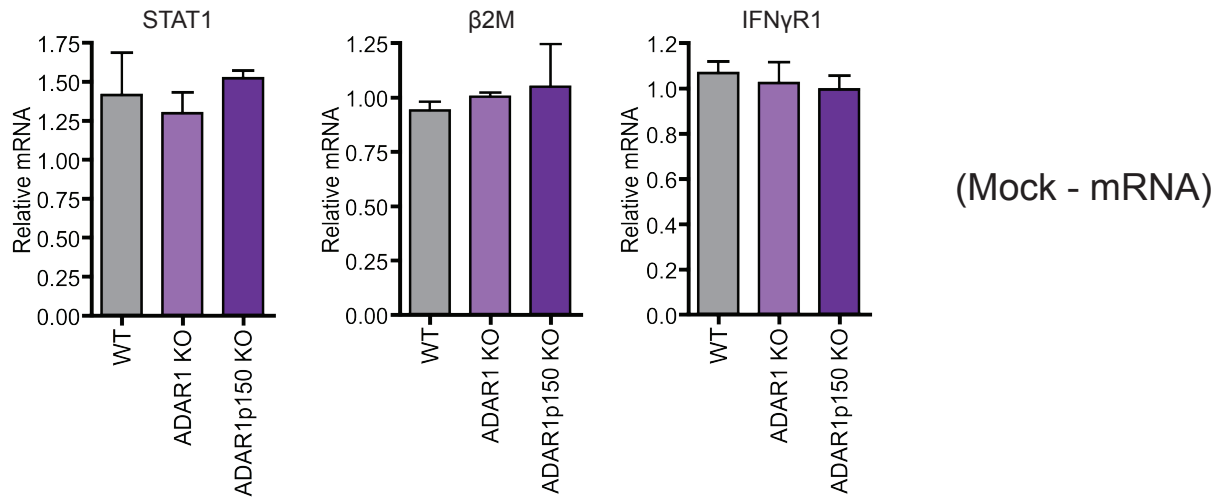**B**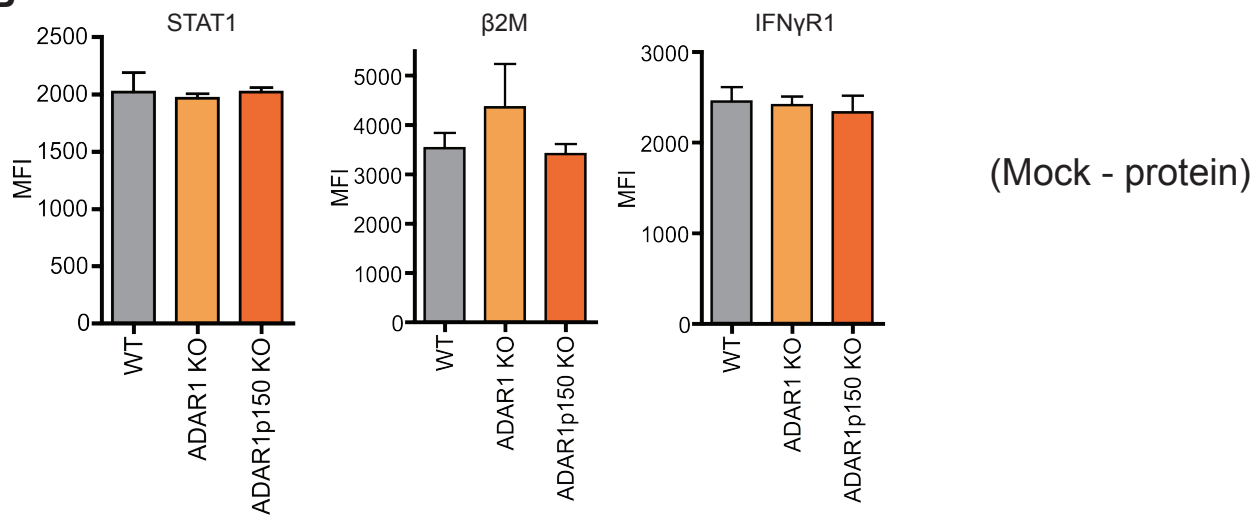**Figure S3**

Supplement: NIHMS934719-supplement-3.pdf [file NIHMS934719-supplement-3.pdf]

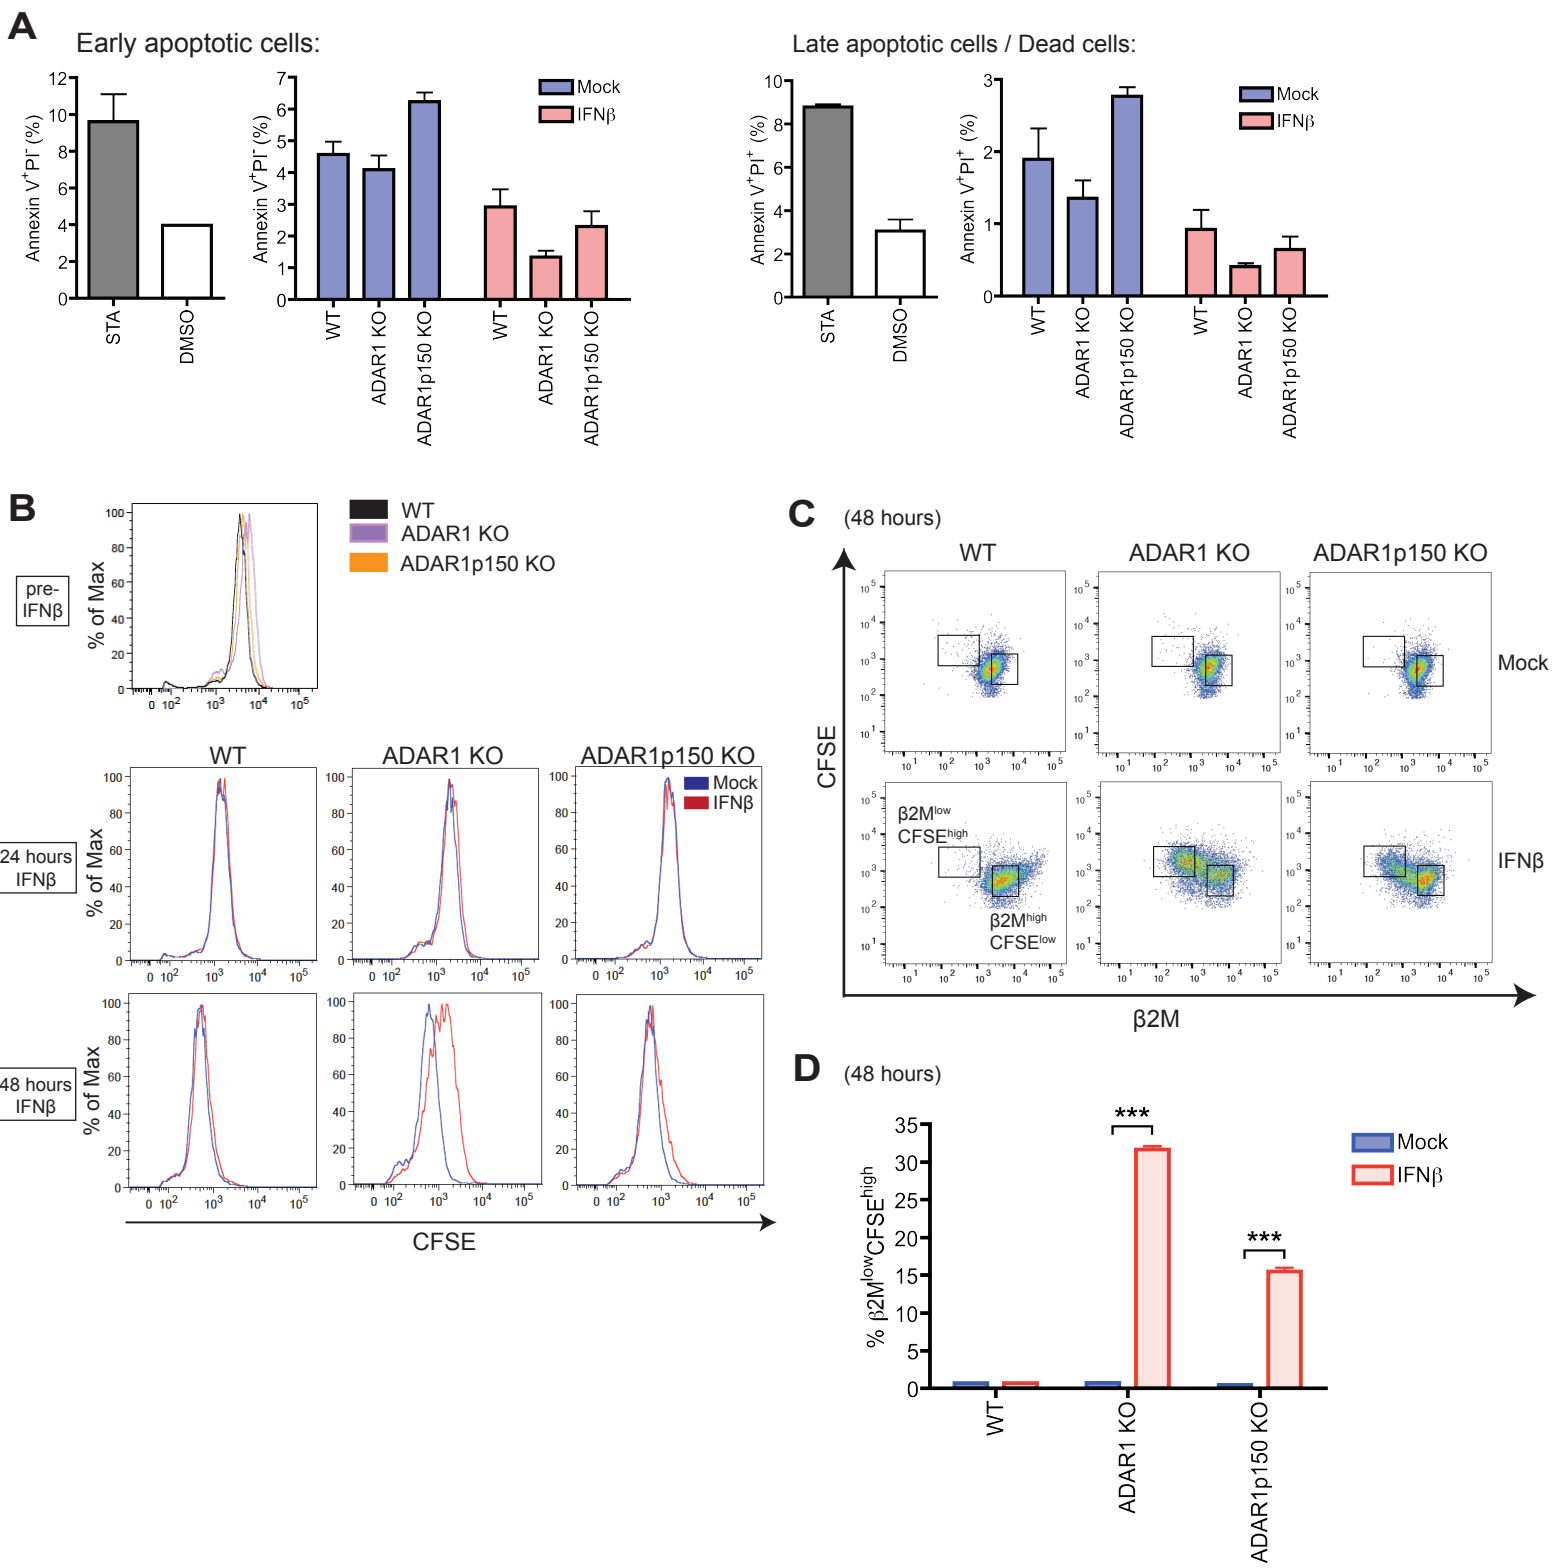

Figure S4

Supplement: NIHMS934719-supplement-4.pdf [file NIHMS934719-supplement-4.pdf]

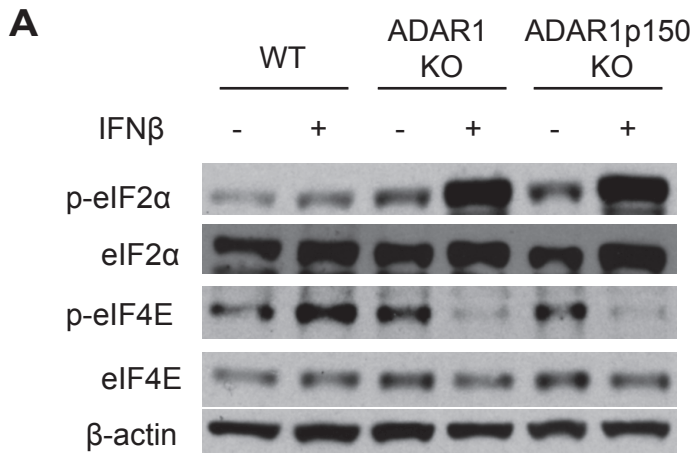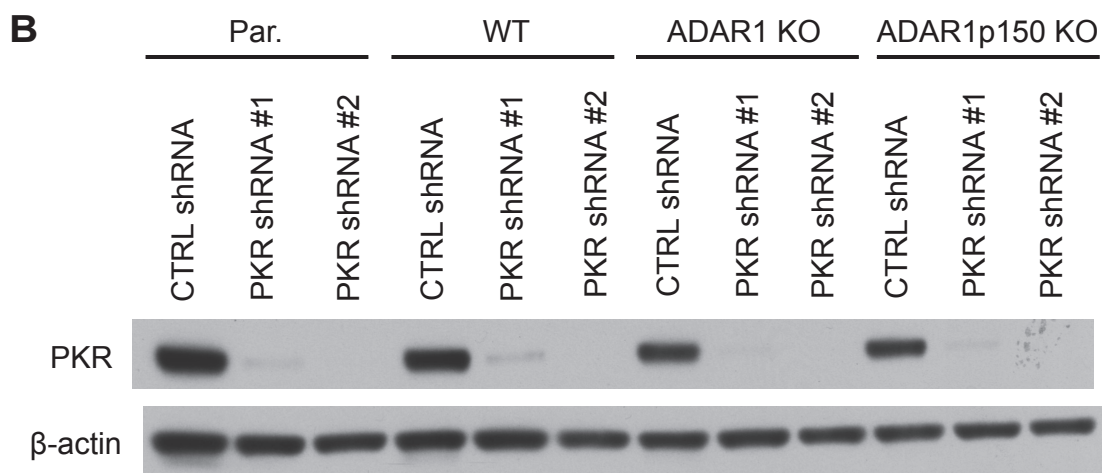

**Figure S5**

Supplement: NIHMS934719-supplement-5.pdf [file NIHMS934719-supplement-5.pdf]

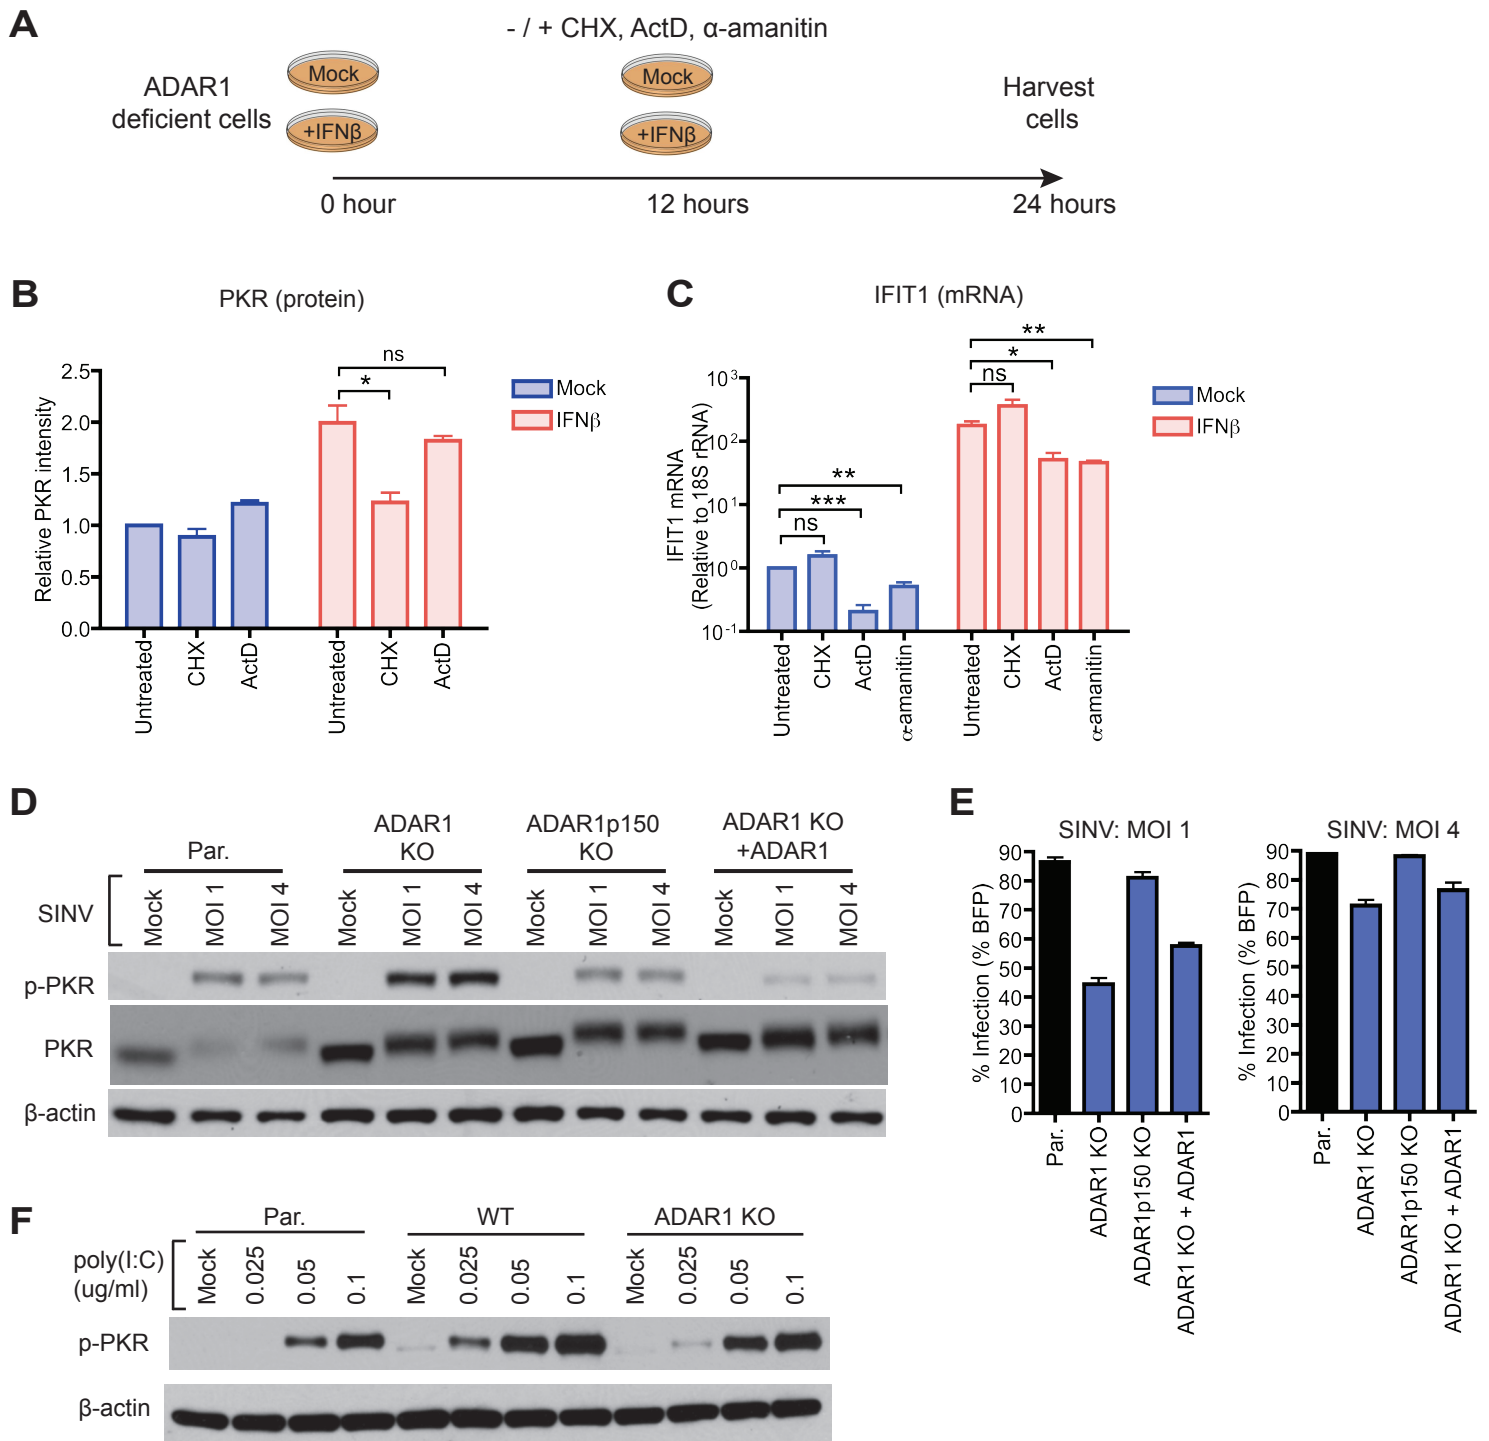

Figure S6

Supplement: NIHMS934719-supplement-6.pdf [file NIHMS934719-supplement-6.pdf]
